# Supplementary material for: Dissecting a novel allosteric mechanism of cruzain: A computer-aided approach
Source: PubMed Central journal article supplement (PMC6347273; doi:10.1371/journal.pone.0211227), 2019-01-25
Supplement: pone.0211227.s001.pdf [file pone.0211227.s001.pdf]

**S1 Table. Principal hydrogen bonds established along simulation time between cruzain allosteric site and hit compounds.**

| <b>System</b>                     | <b>Acceptor</b> | <b>Donor</b> | <b>Stability (%)</b> | <b>AvgDist (Å)</b> |
|-----------------------------------|-----------------|--------------|----------------------|--------------------|
| <b>Cruzain-compound 1</b>         | Comp1_O1        | GLU50_OE2    | 68.41                | 2.71               |
|                                   | ASN182_O        | Comp1_O2     | 44.96                | 2.75               |
|                                   | Comp1_O3        | ASN47_ND2    | 21.03                | 2.88               |
|                                   | Comp1_O3        | ASN47_ND2    | 16.25                | 2.88               |
| <b>Cruzain-compound 2</b>         | GLU35_OE2       | Comp2_O1     | 56.01                | 2.56               |
|                                   | GLU35_OE1       | Comp2_O1     | 40.86                | 2.57               |
|                                   | GLU50_OE1       | Comp2_N1     | 37.18                | 2.77               |
|                                   | GLU86_OE1       | Comp2_N1     | 32.02                | 2.85               |
|                                   | Comp2_O1        | GLU50_OE2    | 25.75                | 2.78               |
|                                   | ASN47_OD1       | Comp2_N1     | 16.05                | 2.83               |
| <b>Cruzain-peptide</b>            | ASP161_O        | PHE220_N     | 89.32                | 2.83               |
|                                   | GLY66_O         | LEU219_N     | 84.32                | 2.84               |
|                                   | LEU219_O        | GLY66_N      | 48.50                | 2.9                |
|                                   | LEU221_O        | GLN19_NE2    | 33.73                | 2.87               |
|                                   | LEU221_O        | TRP184_NE1   | 22.36                | 2.89               |
|                                   | ASP161_O        | LEU221_N     | 21.18                | 2.92               |
| <b>Cruzain-peptide-compound 1</b> | ASP161_O        | PHE220_N     | 87.55                | 2.84               |
|                                   | GLY66_O         | LEU219_N     | 75.81                | 2.86               |
|                                   | LEU219_O        | GLY66_N      | 44.72                | 2.89               |
|                                   | LEU221_O        | TRP184_NE1   | 29.67                | 2.88               |
|                                   | ASP161_O        | LEU221_N     | 24.80                | 2.91               |
| <b>Cruzain-peptide-compound 2</b> | ASP161_O        | PHE220_N     | 79.92                | 2.83               |
|                                   | GLY66_O         | LEU219_N     | 79.79                | 2.85               |
|                                   | LEU219_O        | GLY66_N      | 43.20                | 2.89               |
|                                   | LEU221_O        | TRP184_NE1   | 28.66                | 2.88               |
|                                   | ASP161_O        | LEU221_N     | 25.65                | 2.91               |
|                                   | LEU221_O        | GLN19_NE2    | 23.34                | 2.88               |
