# Supplementary material for: Dissecting a novel allosteric mechanism of cruzain: A computer-aided approach
Source: PubMed Central journal article supplement (PMC6347273; doi:10.1371/journal.pone.0211227), 2019-01-25
Supplement: pone.0211227.s002.pdf [file pone.0211227.s002.pdf]

**S1 Table. Distribution of cruzain residues within optimal community structures of apo and holo forms.**

| <b>Comm ID</b> | <b>Apo</b>                      | <b>Cruzain - peptide</b>             | <b>Cruzain-compound 1</b>          | <b>Cruzain-compound 2</b>                | <b>Cruzain-peptide-compound 1</b> | <b>Cruzain-peptide-compound 2</b> |
|----------------|---------------------------------|--------------------------------------|------------------------------------|------------------------------------------|-----------------------------------|-----------------------------------|
| 1              | 1-13, 151-152, 167-179, 195-198 | 1-15, 151-154, 167-179, 181, 195-198 | 1-13, 150-153, 167-179, 194-198    | 1-14, 133-135, 146-152, 165-182, 188-198 | 1-12, 151-153, 167-179, 195-198   | 1-7, 151-154, 167-179, 194-198    |
| 2              | 14-18, 146-150, 180-194         | 16-24, 92-98, 182-183                | 14-19, 145-149, 183-193            | 15-19, 183-187                           | 13-17                             | 8-17                              |
| 3              | 19-22, 92-97                    | 25-46                                | 20-23, 51-66, 92-102               | 20-22, 47-59, 81-111                     | 18-19, 180-194                    | 18-19, 141-150, 181-193           |
| 4              | 23-24, 57-81                    | 47-56, 80-91, 99-112                 | 24-45                              | 23, 60-80                                | 20, 22-23, 57-67                  | 20-24, 60-66                      |
| 5              | 25-45                           | 57-79                                | 46-50, 83-91, 103-111              | 24-46, 112-115, 211-215                  | 21, 92-98                         | 25-46                             |
| 6              | 46-56, 82-91, 98-111            | 113-119, 209-215                     | 67-82                              | 116-118, 120, 136-145, 153-164, 199-210  | 24-46                             | 47-49, 81-91, 103-112             |
| 7              | 112-116, 210-215                | 120-132, 155, 199-208                | 112-116, 211-215                   | 119, 121-132                             | 47-56, 82-91, 99-111              | 50-59, 92-102                     |
| 8              | 117-132                         | 133-140, 156-166, 180                | 117-132, 199-200                   | -                                        | 68-81, 112                        | 67-80                             |
| 9              | 133-145, 153-166, 199-209       | 141-150, 184-194                     | 133-144, 154-166, 180-182, 201-210 | -                                        | 113-119, 209-215                  | 113-118, 208-215                  |
| 10             |                                 |                                      |                                    |                                          | 120-133, 199                      | 119-132, 199-207                  |
| 11             |                                 |                                      |                                    |                                          | 134-141, 154-166, 200-208         | 133-140, 155-166, 180             |
| 12             |                                 |                                      |                                    |                                          | 142-150                           |                                   |
